# Supplementary material for: From geoscientific "matters of fact" to societal "matters of concern": a transdisciplinary training approach to communicating earthquake risk in Istanbul (Turkey)
Source: Copernicus journal article supplement (doi:10.5194/nhess-2016-26), 2016-01-25

## Supplementary Material – Illustrations

### 1. Gecekondu of the first generation, Zeytinburnu

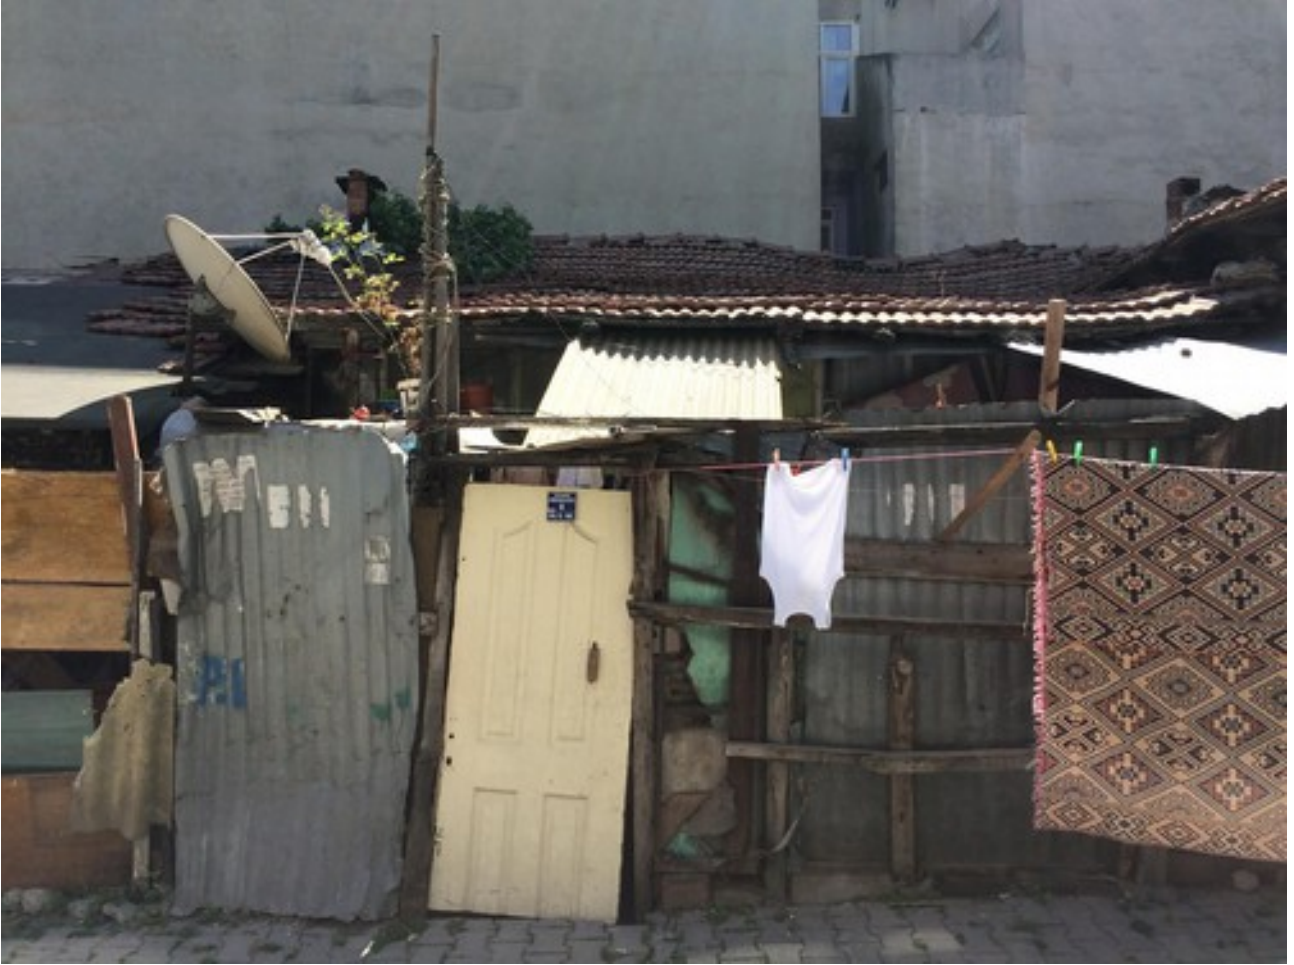

2. Post-gecekondu settlement, Zeytinburnu

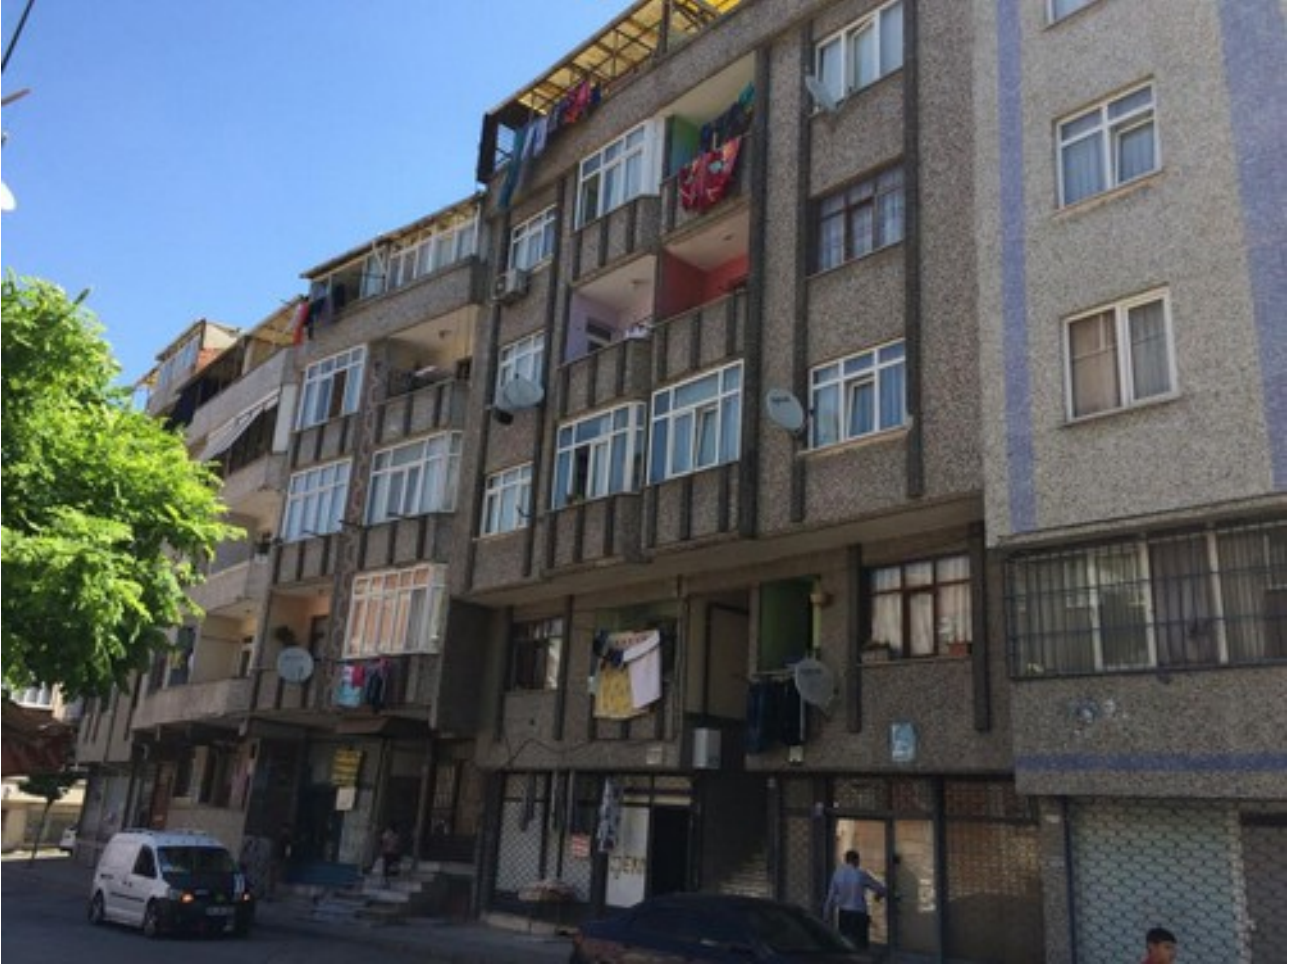

### 3. Interviews with local residents in Zeytinburnu

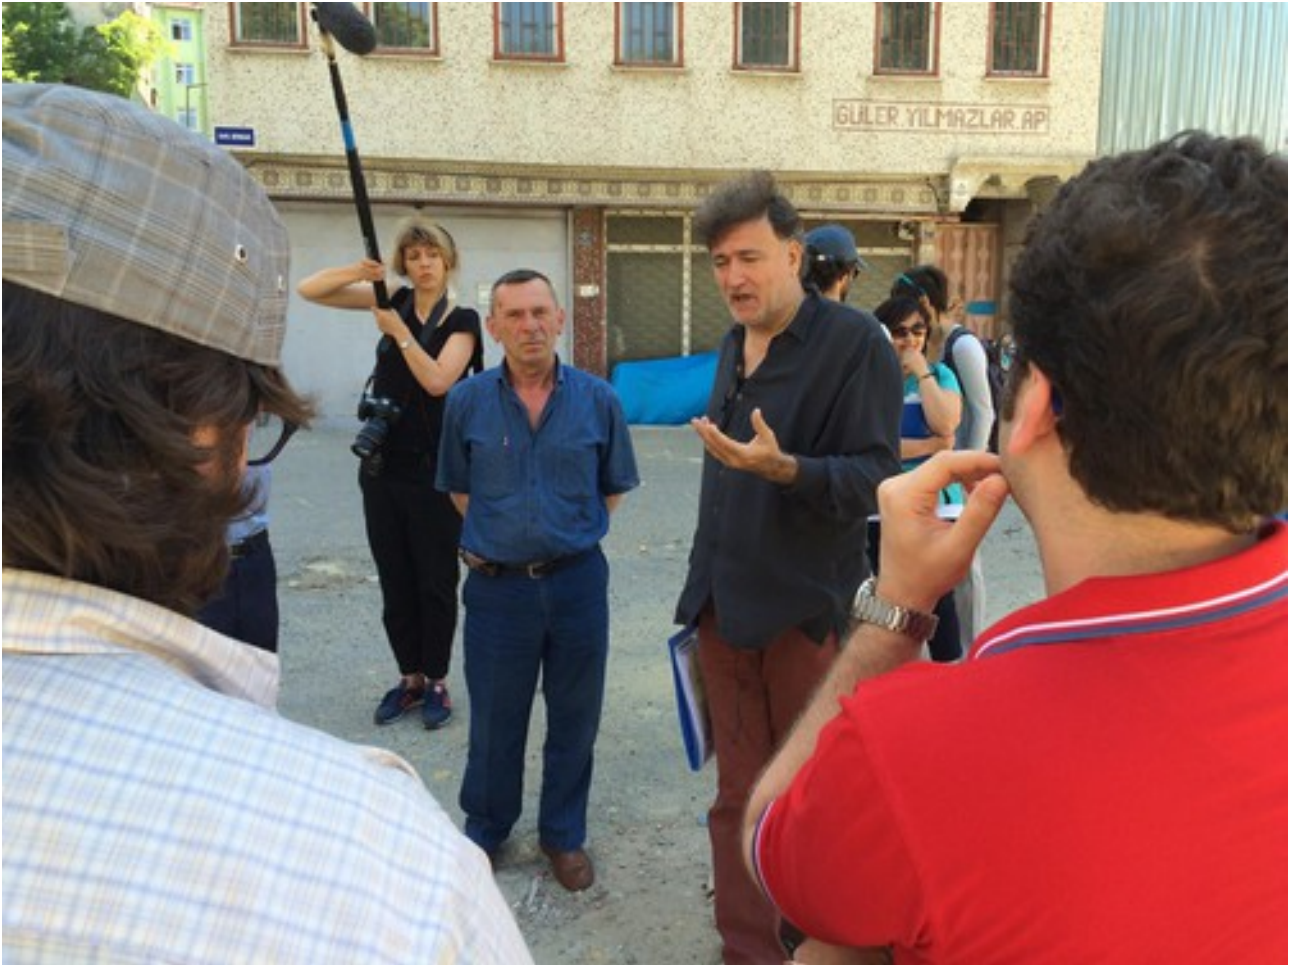

#### 4. After the Urban Transformation: New Multi-Storey Apartment Blocks in Zeytinburnu

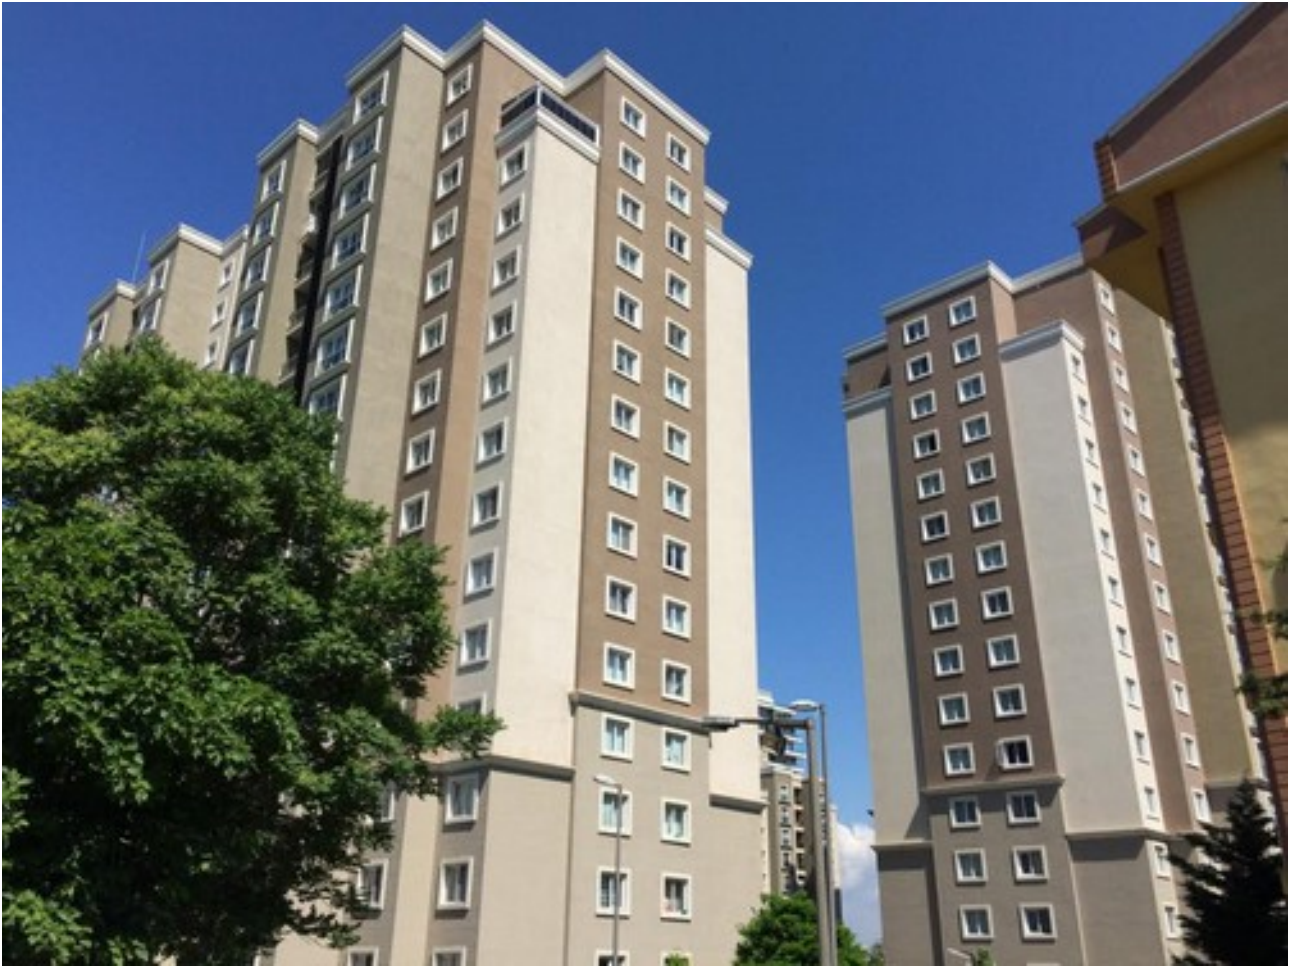

5. Roundtable Discussion in Okmeydanı with Representative of Neighbourhood Organization and Orhan Esen

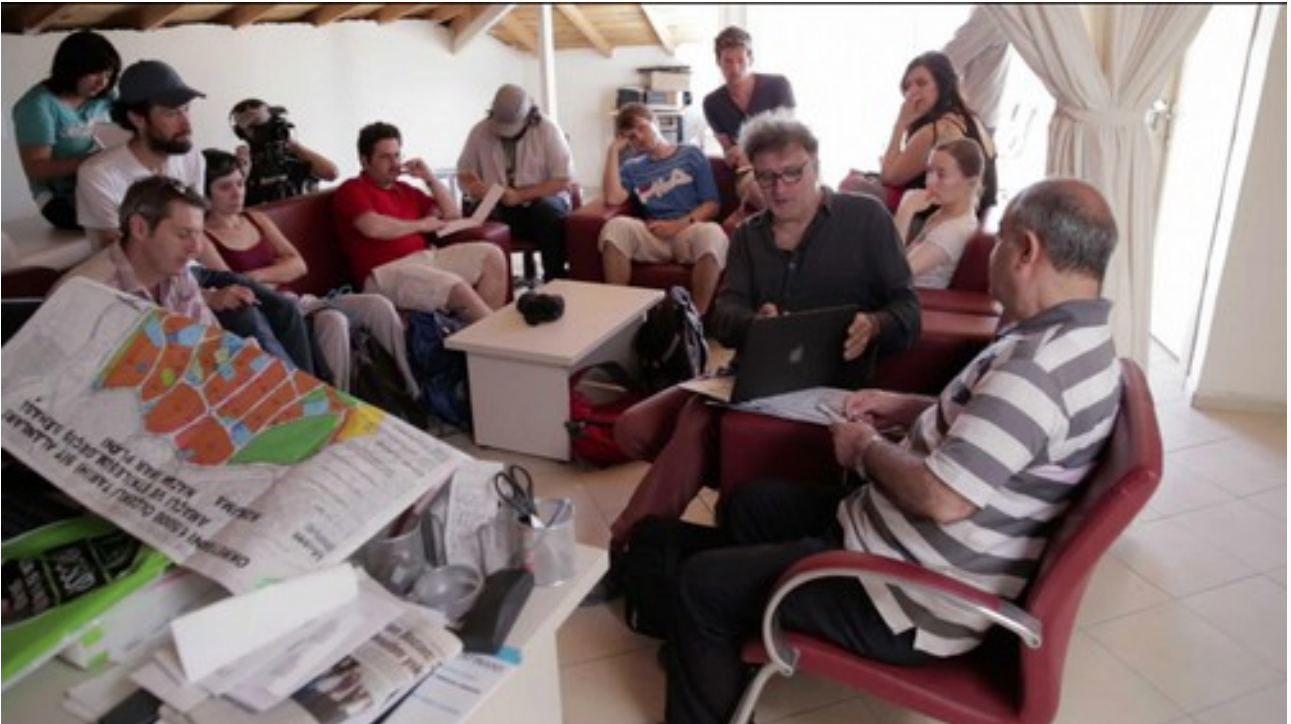

6. ALerT Working Group searching for “actionable” seismic risk communication

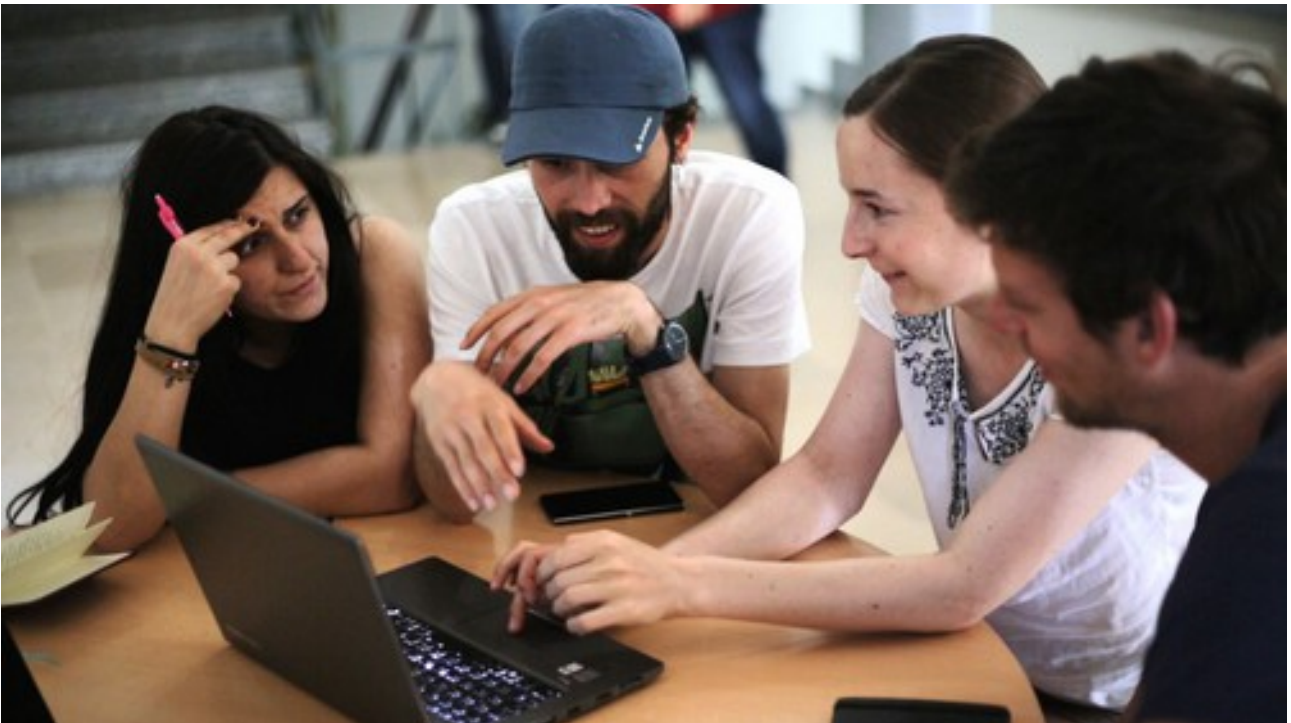

7. ALerT reserachers discussing about the role and responsibility of geocommunicators

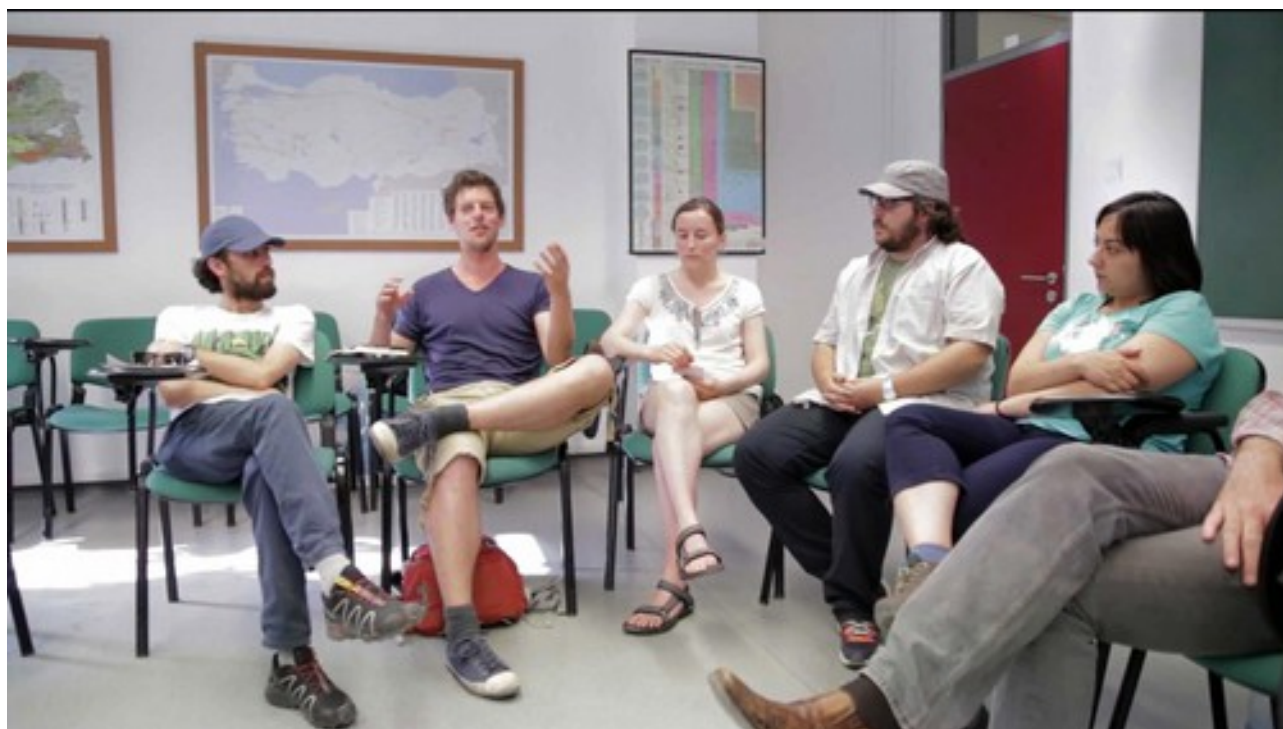

Supplement: Supplementary file 1 [file nhess-2016-26-supplement.zip]
