# Supplementary material for: From geoscientific "matters of fact" to societal "matters of concern": a transdisciplinary training approach to communicating earthquake risk in Istanbul (Turkey)
Source: Copernicus journal article supplement (doi:10.5194/nhess-2016-26), 2016-01-25

## Supplementary Material – Tables and Figures

Frequency of Emotional and Moral Codes by Country (Joffe et al., 2013)

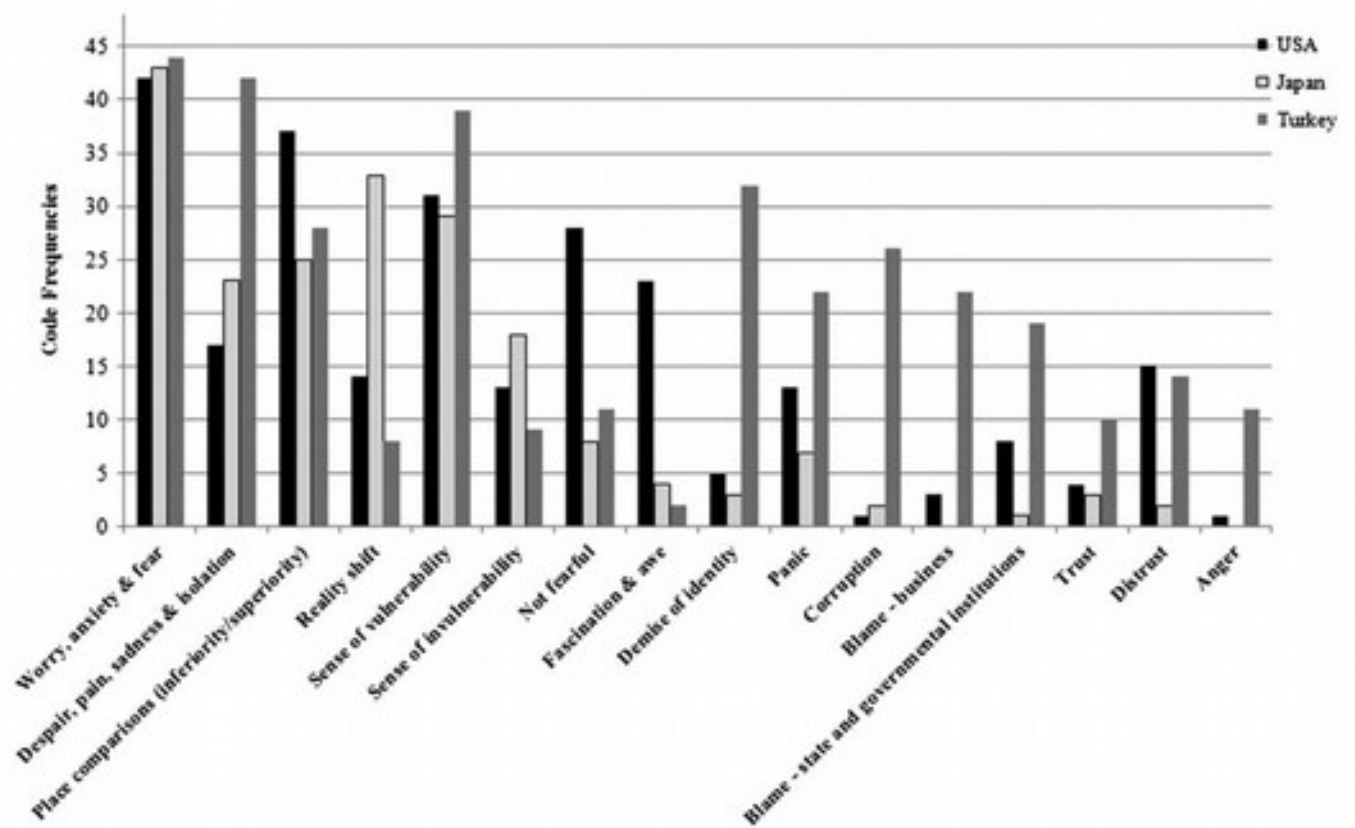

Supplement: Supplementary file 2 [file nhess-2016-26-supplement.zip]
